# Supplementary material
Source: PubMed Central journal article supplement (PMC2857068)
Supplement: supp_M109.052555_jbc.M109.052555-1.pdf [file supp_M109.052555_jbc.M109.052555-1.pdf]

## SUPPLEMENTARY FIGURE LEGENDS

**FIGURE S1. Specificity of oxPTP mAb for oxidized highly conserved PTP peptide surrounding the catalytic site cysteine.** *A-B*, The peptides VHCSAG and its oxidized form ox-VHCSAG were prepared as described in Experimental procedures, and dissolved in PBS. Masses of VHCSAG (*A*) and ox-VHCSAG (*B*) were determined by mass spectrometry. *C*, mAb oxPTP in PBS (Con.) or in PBS with different concentrations of VHCSAG or ox-VHCSAG peptides was used for immunoblotting detection of oxidized phosphatases in size-fractionated postnuclear supernatants from Triton X-100-solubilized RBL cells activated for 15 min with 0.2 mM pervanadate. The blots were analyzed by densitometry and the data obtained were normalized to a control without peptide (Fold). Numbers on the right indicate positions of molecular weight markers in kDa. Two immunoblotting experiments were performed with similar results.

**FIGURE S2. Oxidation of immunoprecipitated PTPs.** BMMCs were activated by Pv (0.2 mM, 15 min), and SHP-1, SHP-2, HePTP and PTP-MEG2 (MEG2) were immunoprecipitated with the corresponding antibodies. The immunoprecipitated PTPs together with total cell lysates (Total) were size-fractionated by SDS-PAGE and analyzed by immunoblotting with oxPTP mAb (left) or PTP-specific antibodies (right). Position of individual phosphatases is indicated on the right. It should be noted that in fractionated total cell lysate, oxPTP mAb reacts weakly with SHP-2 and strongly with SHP-1, which has lower molecular weight.

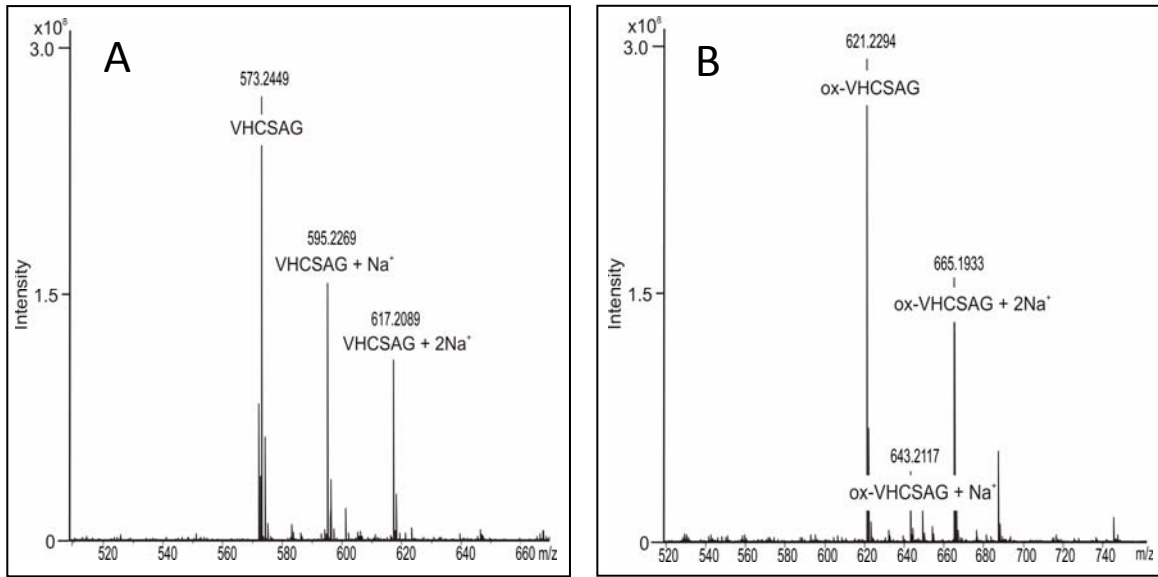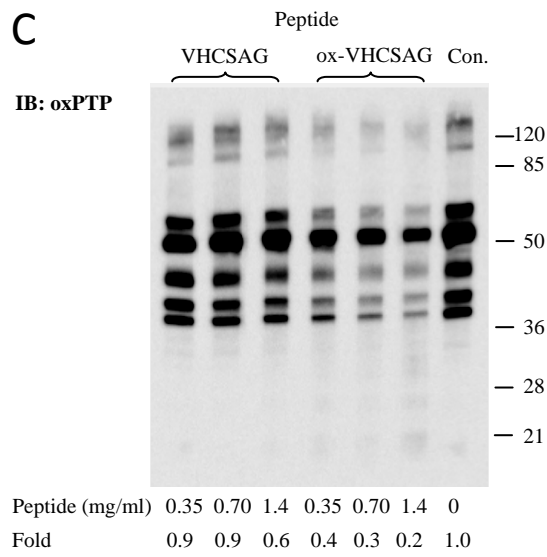

Figure S1  
Heneberg et al.

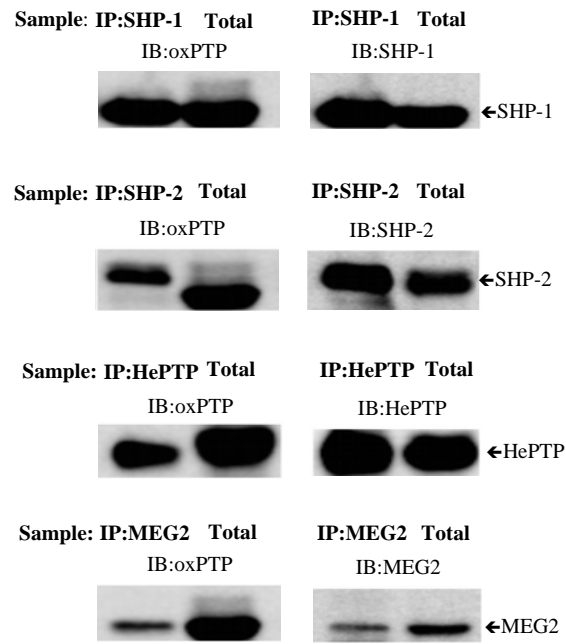

Figure S2  
Heneberg et al.

TABLE S1  
Mass spectrometry identification of SHP-1 in oxPTP mAb immunoprecipitate

| Measured mass<br>[M+H] <sup>+</sup> | Computed mass<br>[M+H] <sup>+</sup> | Peptide sequence          | Peptide position |
|-------------------------------------|-------------------------------------|---------------------------|------------------|
| 897.4352                            | 897.4344                            | R.QPYYATR.V               | 211 - 217        |
| 902.4982                            | 902.4974                            | R.GVPGSFLAR.P             | 22 - 30          |
| 991.4257                            | 991.4247                            | R.EHDTAEYK.L              | 384 - 391        |
| 1069.5526                           | 1069.5516                           | R.LEGQRPENK.S             | 263 - 271        |
| 1081.5512                           | 1081.5512                           | R.VDDQVTHIR.I             | 45 - 53          |
| 1097.5616                           | 1097.5618                           | K.NILPFDHSR.V             | 278 - 286        |
| 1103.576                            | 1103.5764                           | K.GEPWTFLLVR.E            | 128 - 136        |
| 1121.5462                           | 1121.5465                           | K.NQGDFSLSVR.V            | 35 - 44          |
| 1240.5762                           | 1240.5758                           | R.SGMVQTEAQYK.F           | 496 - 506        |
| 1257.6349                           | 1257.6353                           | R.VYGLYSVTNSR.E           | 373 - 383        |
| 1437.6204                           | 1437.6194                           | K.YPLNCSPTSER.W           | 98 - 109         |
| 1469.6829                           | 1469.6827                           | K.AGFWEFESLQK.Q           | 242 - 253        |
| 1490.6969                           | 1490.6976                           | K.CVPYWPEVGTQR.V          | 361 - 372        |
| 1511.7603                           | 1511.762                            | K.TGIEEASGAFVYLR.Q        | 197 - 210        |
| 1539.8256                           | 1539.8257                           | R.TLQISPLDNGDLVR.E        | 394 - 407        |
| 1642.8991                           | 1642.897                            | K.FIYVAIAQFIETTK.K        | 507 - 520        |
| 1704.7631                           | 1704.7631                           | R.IQNSGDFYDLYGGEK.F       | 54 - 68          |
| 1768.8305                           | 1768.8268                           | R.DSNIPGSDYINANYVK.N      | 293 - 308        |
| 1779.8456                           | 1779.8428                           | K.GQSEYGNITYPPAVR.S       | 531 - 546        |
| 1980.9829                           | 1980.9806                           | R.WYHGHISGGQAESLLQAK.G    | 110 - 127        |
| 2072.0445                           | 2072.0426                           | R.ESLSQPGDFVLSVLNDQPK.A   | 137 - 155        |
| 2244.0541                           | 2244.0587                           | R.YTVGGSETFDSLTDLVEHFK.K  | 176 - 195        |
| 2372.1611                           | 2372.1536                           | R.YTVGGSETFDSLTDLVEHFKK.T | 176 - 196        |
| 2515.2648                           | 2515.2595                           | K.FATLTELVEYYTQQQILQDR.D  | 69 - 89          |

**1** MVRWFHRDLS GPDAETLLKG RGVPGSFLAR PSRKNQGDFS LSVRVDDQVT  
**51** HIRIQNSGDF YDLYGGEKFA TLTELVEYYT QQQILQDRD GTIIHLKYPL  
**101** NCSPTSERW YHGHISGGQA ESLLQAKGEP WTFLLVRESLS QPGDFVLSVL  
**151** NDQPKAGPGS PLRVTHIKVM CEGGRYTVGG SETFDSLTDL VEHFKKTGIE  
**201** EASGAFVYLR QPYYATRVNA ADIENRVLEL NKKQSESDTA KAGFWEEFES  
**251** LQKQEVKLNH QRLEGQRPEN KSKNRYKNIL PFDHSRVILQ GRDSNIPGSD  
**301** YINANYVKNQ LLGPDENSKT YIASQGCLDA TVNDFWQMAW QENTRVIVMT  
**351** TREVEKGRNK CVPYWPEVGT QRVYGLYSVT NSREHDTAEY KLRTLQISPL  
**401** DNGDLVREIW HYQYLSWPDH GVPSEPGGVL SFLDQINQRQ ESLPHAGPII  
**451** VHCSAGIGRT GTIIVIDMLM ESISTKGLDC DIDIQKTIQM VRAQRSGMVQ  
**501** TEAQYKFIYV AIAQFIETTK KKLEIIQSOK GQSEYGNIT YPPAVRSAHA  
**551** KASRTSSKHK EEVYENVHSK SKKEEKVKKQ RSADKEKNKG SLKRK

The cells were activated by pervanadate (0.2 mM, 15 min) and oxidized PTPs were immunoprecipitated with oxPTP mAb and analyzed by mass spectrometry as described in Experimental procedures. Measured and computed masses, peptide sequences and peptide positions are shown. Amino acids of the identified peptides in the mouse SHP-1 (UniProtKB/Swiss-Prot P29351) are indicated in bold and underlined (bottom part of the table).

TABLE S2

**Mass spectrometry identification of SHP-2 in oxPTP mAb immunoprecipitate**

| Measured mass<br>[M+H] <sup>+</sup> | Computed mass<br>[M+H] <sup>+</sup> | Peptide sequence          | Peptide position<br>position |
|-------------------------------------|-------------------------------------|---------------------------|------------------------------|
| 1440.7016                           | 1439.6943                           | R.QLTIQHQQECSR.S          | 214 - 224                    |
| 1471.7964                           | 1470.7892                           | R.GEVDILGIVCQLR.L         | 293 - 305                    |
| 1645.8041                           | 1644.7968                           | R.IQDMKEHPEYTVR.Q         | 201 - 213                    |
| 2050.0145                           | 2049.0072                           | K.IPSNPFVNPEDLDIPGHASK.D  | 83 - 101                     |
| 2282.0193                           | 2281.012                            | K.CVHYWPTEEEAYGPFQIR.I    | 183 - 200                    |
| 2372.2179                           | 2371.2106                           | K.HILFSAWPDHQTPESAGPLLR.L | 228 - 248                    |

**1** MTQPPPTKAP AKKHVRLQER RGSSVALMLD VQSLGTVEPI CSVNTPREVT  
**51** LHFLRTAGHP LTRWTLQHQP PSPKQLEEEF LK**IPSNFVNP EDLDIPGHAS**  
**101** **K**DRYKTIILPN PQSRVCLGRA QSQEDSDYIN ANYIRGYDGK EK**VYIATQGP**  
**151** MPNTVADFWE MVWQEDVSLI VMLTQLREGK EK**CVHYWPTE EEAYGPFQIR**  
**201** **IQDMKEHPEY TVRQLTIQHQ QECSR**VKHIL **FSAWPDHQTP ESAGPLLR**LV  
**251** AEVETPETAA NSGPIVVHCS AGIGRTGCFI ATRIGCQQLK AR**GEVDILGI**  
**301** **VCQLRL**DRGG MIQTAEQYQF LHHTLALYAA QLPPEPNP

The cells were activated and analyzed as in Table S1. Amino acids of the identified peptides in the mouse SHP-2 (UniProtKB/Swiss-Prot Q8BUM3) are indicated in bold and underlined (bottom part of the table).
